# Supplementary material for: The Increase of The Relative Amount of Nodular Calcification In Femoral Plaques is Associated With Milder Lower Extremity Arterial Disease
Source: Research Square preprint supplement (doi:10.21203/rs.3.rs-1206331/v1), 2022-01-14
Supplement: Supplementary file 1 [file 58451a7b9bb0eeba96024524.docx]

**Supplementary Table S1**

Association of NodCa and ShCa area proportions with the categorical baseline characteristics.

| Category | (n) NodCa | (n) ShCa | NodCa | ShCa | Category | (n)  NodCa | (n) ShCa | NodCa | ShCa | *p* NodCa | *p*  ShCa |
| --- | --- | --- | --- | --- | --- | --- | --- | --- | --- | --- | --- |
| Age ≥ 70.5 years | 22 | 22 | 22.6 ± 12.3 | 14.2 ± 11.9 | Age < 70.5 | 27 | 26 | 22.2 ± 12.5 | 14.8. ± 12.0 | 0.747 | 0.852 |
| Males | 28 | 26 | 23.9 ± 11.8 | 13.1 ± 10.0 | Females | 21 | 22 | 20.6 ± 12.9 | 16.2 ± 13.7 | 0.315 | 0.983 |
| BMI > 25 Kg/m2 | 28 | 26 | 24.7 ± 9.8 | 10.5 ± 6.9 | BMI (18.5-25) | 19 | 20 | 19.3 ± 15.4 | 20.0 ± 15.1 | 0.190 | **< 0.05** |
| Previous, current smokers | 45 | 44 | 22.3 ± 12.1 | 13.6 ± 11.3 | Never smokers | 2 | 2 | 17.4 ± 17.5 | 24.8 ± 24.1 | 0.578 | 0.495 |
| Diabetes type I or II | 14 | 13 | 26.4 ± 8.8 | 10.4 ± 5.5 | No | 33 | 33 | 20.6 ± 13.4 | 16.3 ± 13.5 | 0.085 | 0.400 |
| Hypertension | 41 | 41 | 22.4 ± 12.0 | 14.7 ± 11.6 | No | 8 | 7 | 22.3 ± 14.5 | 13.2 ± 13.7 | 0.971 | 0.492 |
| Dyslipidemia | 45 | 43 | 22.6 ± 12.1 | 13.7 ± 10.7 | No | 5 | 4 | 18.7 ± 14.5 | 25.1 ± 20.1 | 0.503 | 0.307 |
| Coronary artery disease | 12 | 12 | 26.2 ± 11.4 | 14.6 ± 12.0 | No | 35 | 34 | 20.8 ± 12.9 | 14.1 ± 12.1 | 0.305 | 0.755 |
| Cerebro-vascular accident | 3 | 3 | 28.6 ± 11.6 | 19.1 ± 9.2 | No | 44 | 43 | 22.5 ± 12.2 | 13.7 ± 11.7 | 0.406 | 0.208 |
| Increased hs-CRPa | 13 | 12 | 26.9 ± 10.2 | 13.4 ± 11.5 | No | 36 | 36 | 20.8 ± 12.7 | 14.9 ± 12.0 | 0.121 | 0.775 |
| Impaired GFRb | 9 | 9 | 28.5 ± 10.8 | 12.7 ± 11.8 | No | 39 | 38 | 21.6 ± 12.0 | 14.3 ± 11.5 | 0.119 | 0.604 |
| Leukocytosisc | 19 | 19 | 24.0 ± 11.5 | 13.6 ± 11.4 | No | 27 | 26 | 10.5 ± 13.1 | 16.0 ± 12.6 | 0.357 | 0.513 |
| Anaemicd | 7 | 12 | 23.8 ± 13.0 | 14.6 ± 12.0 | No | 41 | 34 | 22.0 ± 12.3 | 14.1 ± 12.1 | 0.728 | 0.608 |
| Statin users | 37 | 35 | 23.6 ± 11.7 | 14.9 ± 10.8 | No | 12 | 13 | 18.6 ± 13.6 | 13.6 ± 14.8 | 0.224 | 0.232 |

Association of NodCa and ShCa area proportions with the categorical baseline characteristics.

Data presented as mean ± SD; analysis of NodCa data by independent T-test; analysis of ShCa data by Mann-Whitney U test

Abbreviations: NodCa, nodular calcification; ShCa, sheet calcification; LEAD, lower extremity arterial disease; BMI, body mass index; hs-CRP, high sensitive chain reactive protein; GFR, glomerular filtration rate. No, absence of the category.

a Females’ values > 2.5 mg/L and males’ values > 3 mg/L.

b Values < 77 for patients aged (50-59)years, < 69 for patients aged (60-69), < 59 for patients aged 70 years and over.

c Values > 8.2 E9/L.

d Females’ Hb readings <117 g/L and males’ readings < 134 g/L.

**SupplementaryTable S2**

Correlation of NodCa and ShCa area proportions with the continuous patients’ characteristics.

|  | NodCa |  |  | ShCa |  |  |
| --- | --- | --- | --- | --- | --- | --- |
|  | rho | N | *p* | rho | N | *p* |
| Age (years) | 0.130 | 49 | 0.373 | 0.066 | 49 | 0.655 |
| BMI (kg/m2) | 0.094 | 47 | 0.531 | -0.181 | 46 | 0.23 |
| Leukocytes (10E9/L) | 0.002 | 48 | 0.989 | 0.042 | 47 | 0.777 |
| Hemoglobin (g/L) | -0.195 | 48 | 0.185 | 0.234 | 47 | 0.114 |
| Thrombocytes count (10E9/L) | -0.163 | 48 | 0.267 | -0.216 | 47 | 0.144 |
| hs-CRP (mg/L) | 0.200 | 49 | 0.168 | -0.099 | 48 | 0.505 |
| GFR (mL/min/1.73 m2) | -0.149 | 48 | 0.314 | 0.083 | 47 | 0.58 |
| Total-cholestrol (mmol/L) | 0.013 | 49 | 0.930 | -0.065 | 48 | 0.658 |
| LDL-cholesterol (mmol/L) | -0.017 | 48 | 0.907 | -0.346* | 47 | **< 0.05** |
| HDL-cholestrol (mmol/L) | -0.078 | 49 | 0.594 | 0.419** | 48 | **< 0.005** |
| Triglyceride (mmol/L) | 0.036 | 49 | 0.804 | -0.371** | 48 | **< 0.01** |

NodCa data analysed by Pearson, ShCa data analysed by Spearman rank, rho is the correlation coefficient.

Abbreviations: NodCa, nodular calcification; ShCa, sheet calcification; BMI, body mass index; hs-CRP, high sensitive chain reactive protein; GFR, glomerular filtration rate.


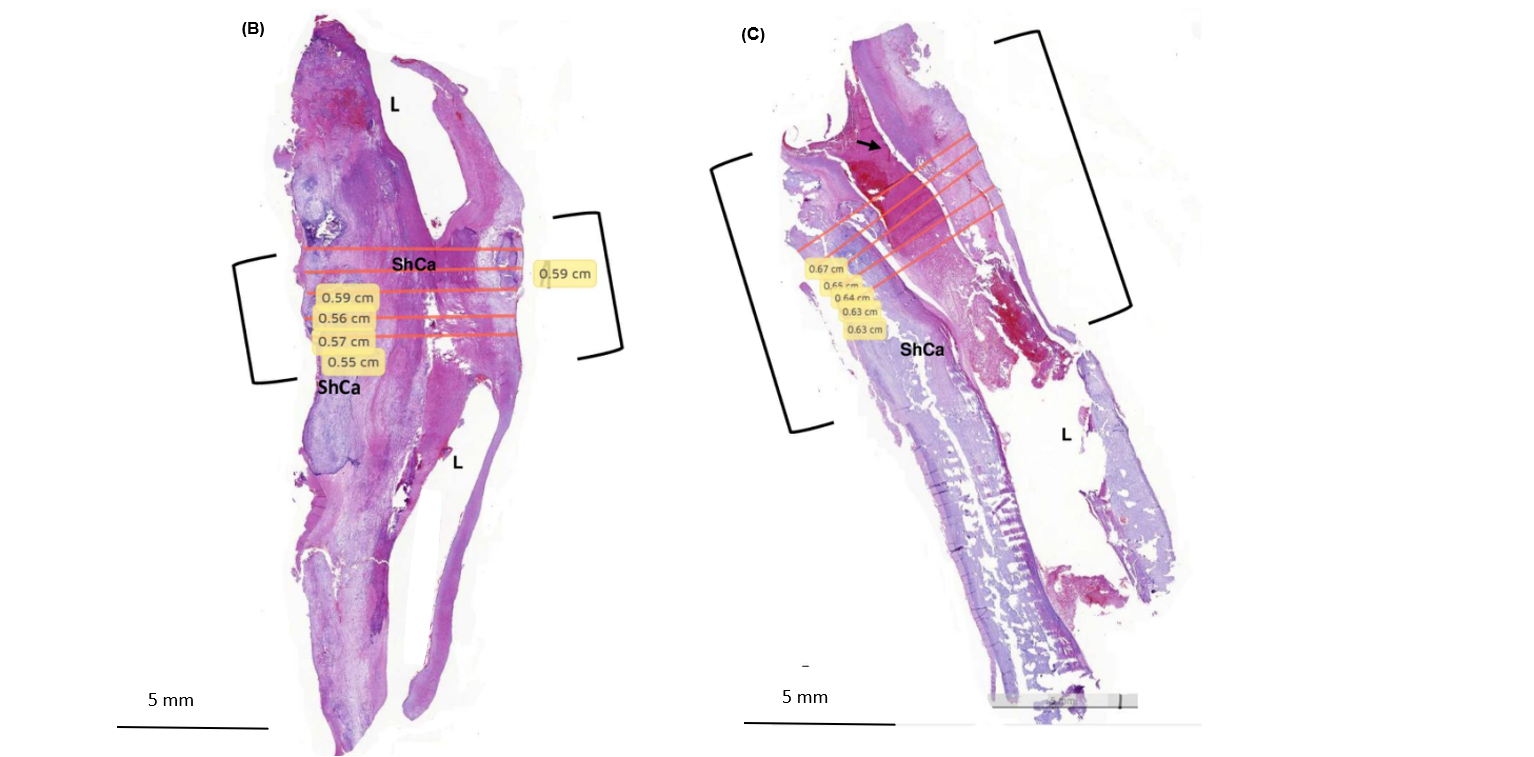

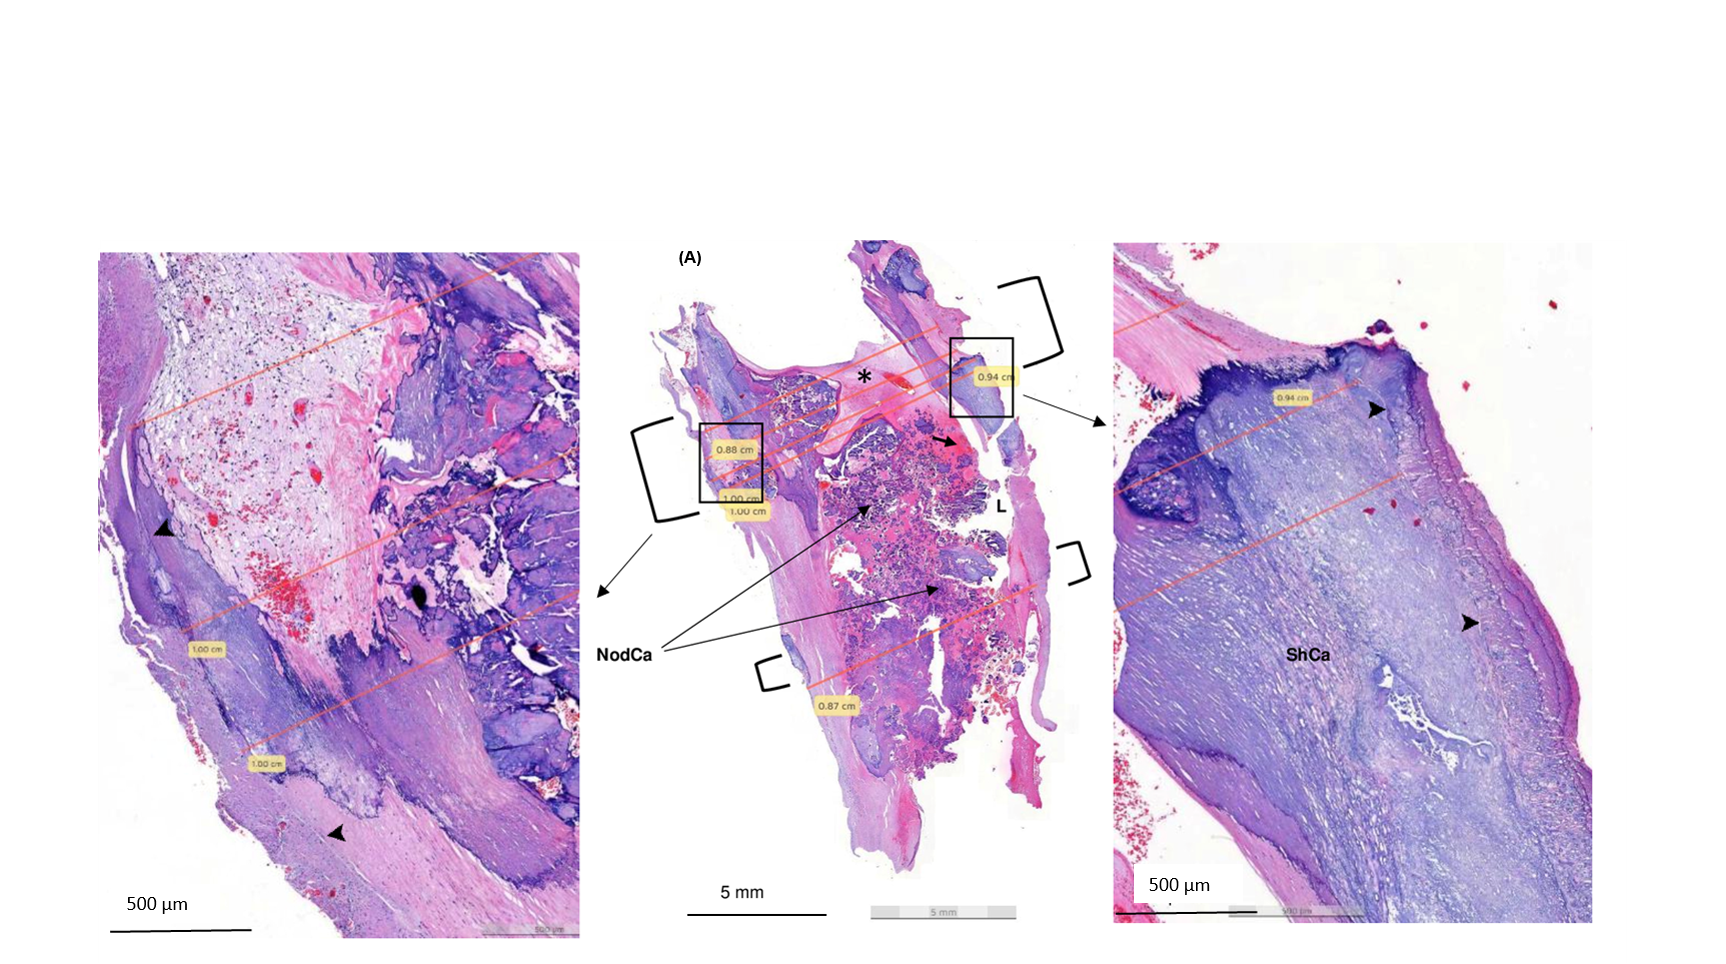


Supplementary Figure S1. Three examples of obstructed femoral plaques (A), (B) and (C) for illustration of the vessel diameter measurement. Maximum internal elastic vessel diameter at the obstruction site (surrounded by squared brackets) was measured. L indicates vessel lumen. Arrowhead refers to internal elastic lamina in the magnified subsections of plaque section (A). Section (A), has mainly nodular calcification (NodCa), 26% of the plaque tissue section, whereas (B) and (C) are dominated by sheet calcification (ShCa, 40% and 41% respectively. Section (A) has a larger measured vessel diameter(10mm) compared to section (B), 5.9mm and section (C), 6.7mm. Small arrow on (C) refers to fibrin, asterisk on (A) refers to the organized thrombus.
